# Supplementary material for: Aptamer and rolling circle amplification-involved sandwich assay for platelet-derived growth factor-BB with absorbance analysis
Source: Royal Society of Chemistry journal article supplement (doi:10.1039/c4ay02921f), 2015-01-01
Supplement: c4ay02921f1.pdf [file c4ay02921f1.pdf]

## Electronic Supplementary Information

### Aptamer and Rolling Circle Amplification Involved Sandwich Assay for Platelet-Derived Growth Factor-BB with Absorbance Analysis

Li Lv<sup>a</sup>, Limin Guo<sup>a</sup>, Qiang Zhao<sup>a,b\*</sup>

<sup>a</sup>Research Institute of Environmental Science, College of Chemistry and Chemical Engineering, Shanxi University, Taiyuan, China, 030006

<sup>b</sup>State Key Laboratory of Environmental Chemistry and Ecotoxicology, Research Center for Eco-Environmental Sciences, Chinese Academy of Sciences, Beijing, 100085, P. R. China

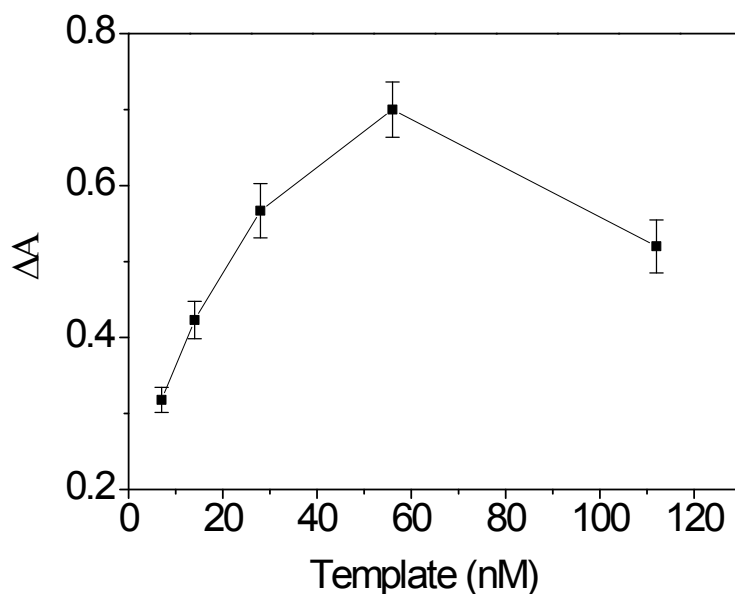

**Fig. S1.** The effect of template concentration on detection of PDGF-BB. Experimental condition: PDGF-BB, 50 pM; Aptamer-primer, 100 nM; Ligase, 0.02 U/ $\mu$ L; dNTPs, 0.1 mM; Polymerase, 0.4 U/ $\mu$ L; Biotinylated probe, 0.36  $\mu$ M; SA-HRP, 80-fold diluted.

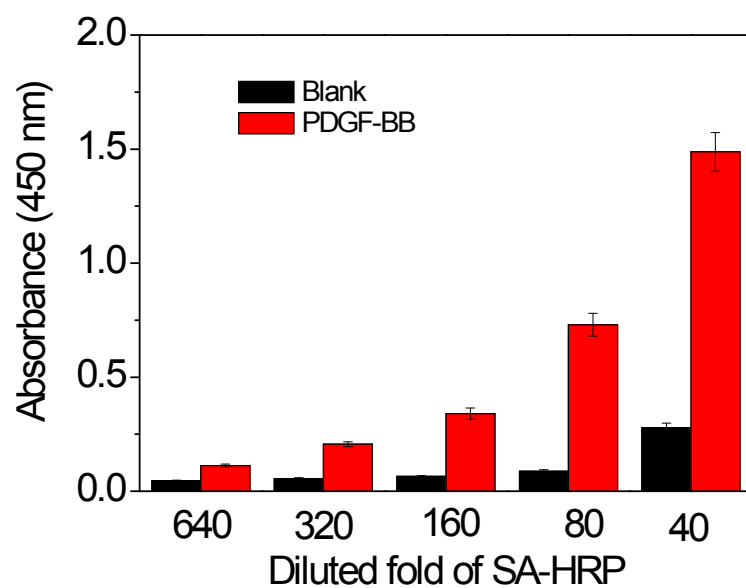

**Fig. S2.** Effect of the diluted fold of SA-HRP on detection of PDGF-BB. Experimental condition: PDGF-BB, 50 pM; Aptamer-primer, 100 nM; Template, 56 nM; Ligase, 0.02 U/ $\mu$ L; Polymerase, 0.4 U/ $\mu$ L; dNTPs, 0.1 mM; Biotinylated probe, 0.36  $\mu$ M.

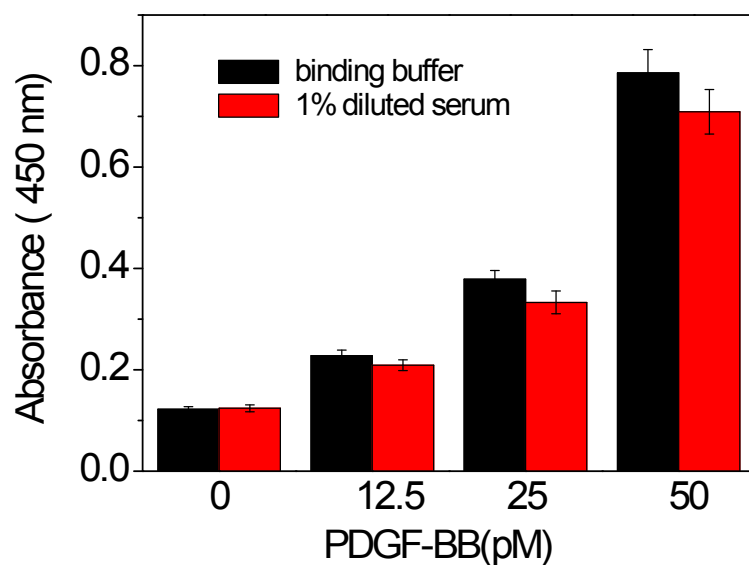

**Fig. S3.** Detection of PDGF-BB spiked in 1% bovine serum sample comparing with the result of detection of PDGF-BB in binding buffer solution.

**Table S1** Comparison of sensitivity of aptamer-based assays for PDGF-BB

| Analytical method                                                   | Detection limit | Reference |
|---------------------------------------------------------------------|-----------------|-----------|
| Capillary electrophoresis with laser-induced fluorescence detection | 0.5 nM          | 14        |
| Fluorescence anisotropy assay                                       | 2 nM            | 16        |
| Fluorescence resonance energy transfer assay                        | 167 pM          | 32        |
| Electrochemiluminescence assay                                      | 80 pM           | 33        |
| Fluorescence analysis with structure-switching based RCA            | 0.4 nM          | 30        |
| Chemiluminescence detection with RCA                                | 10 fM           | 28        |
| Electrochemical assay based on target binding-induced RCA           | 63 pM           | 27        |
| Electrochemical detection with RCA                                  | 10 fM           | 26        |
| Absorbance analysis with RCA                                        | 3.1 pM          | this work |
